# Supplementary material
Source: PubMed Central journal article supplement (PMC5241093)
Supplement: NIHMS638249-supplement-Suppl_data.pdf [file NIHMS638249-supplement-Suppl_data.pdf]

## Neonatal Maternal Separation Alters the Capacity of Adult Neural Precursor Cells to Differentiate into Neurons via Methylation of Retinoic Acid Receptor Gene Promoter

### Supplemental Information

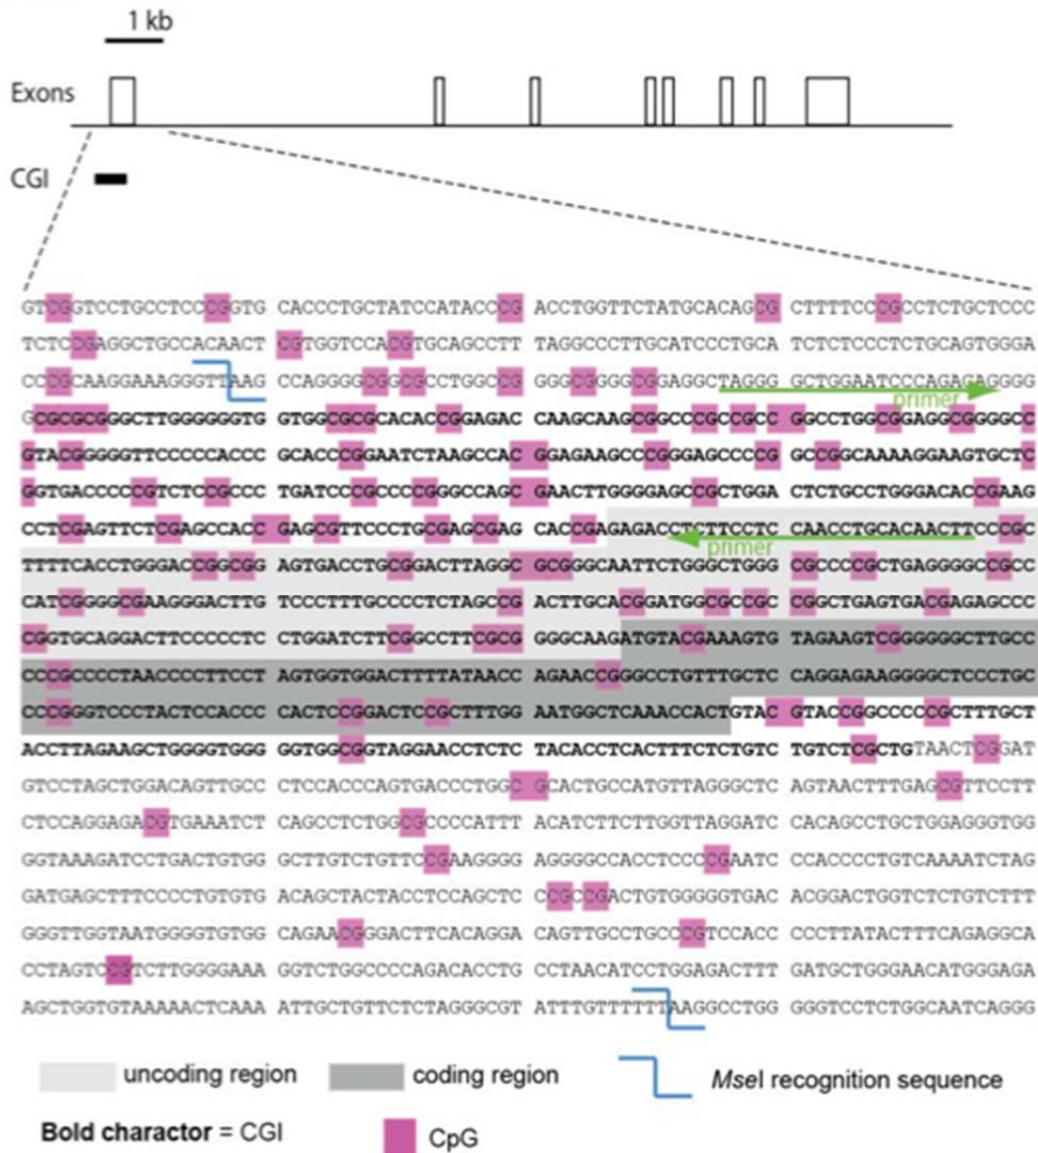

Figure S1. The detailed structure of CpG island in RAR $\alpha$  promoter. Bold characters indicate CpG island (CGI) and pink squares indicate CpG. The primers used in Figure 5A are presented by green arrows.
